# Supplementary material for: Human Macrophages Polarized by Interaction with Apoptotic Cells Produce Fibrosis-Associated Mediators and Enhance Pro-Fibrotic Activity of Dermal Fibroblasts In Vitro
Source: MDPI journal article supplement (doi:10.3390/cells12151928), 2023-07-25
Supplement: s1 [file s1]

## Supplementary Materials

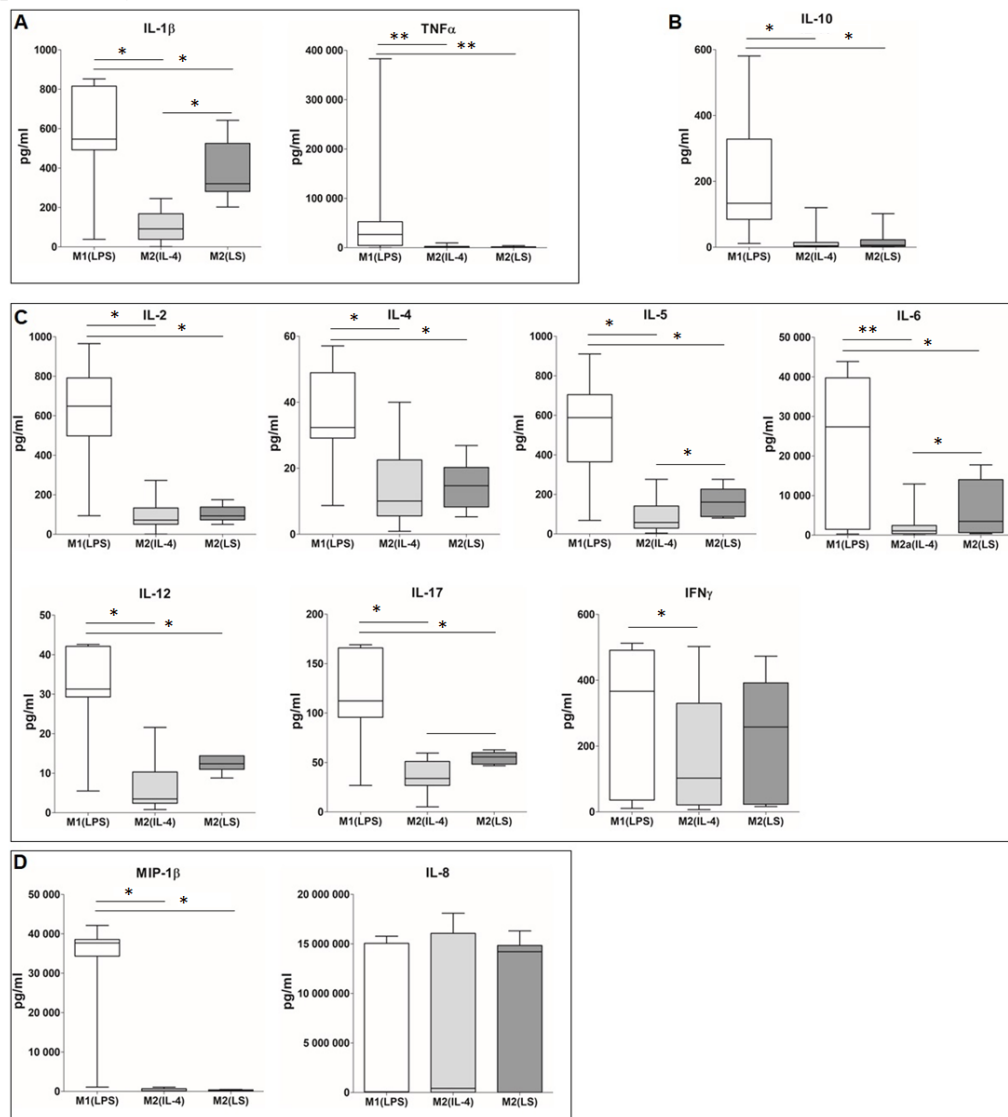

**Figure S1.** Cytokines and chemokines produced by M1(LPS), M2(IL-4), and M2(LS) macrophages. Data are presented as median, interquartile range, minimum and maximum, n=6-16. \* significant at <0.05, \*\* significant at <0.01. **(A)** Pro-inflammatory cytokine (IL-1, TNF $\alpha$ ) production (n=6-16). **(B)** Anti-inflammatory (IL-10) cytokine production (n=16). **(C)** Immunoregulatory cytokine (IL-2, -4, -5, -6, -12, -17, IFN- $\gamma$ ) production (n=6-16). **(D)** Chemokine (MIP-1 $\beta$ , IL-8) production (n=6-16).
